# Supplementary material for: Investigation on the role of nitrates in the microwave-assisted autoclave Pechini synthesis of aluminoborate phosphors
Source: Royal Society of Chemistry journal article supplement (doi:10.1039/d4tc02300e), 2024-01-01
Supplement: d4tc02300e1.pdf [file d4tc02300e1.pdf]

## Supporting information :

### Investigation on the role of nitrates in the microwave-assisted autoclave Pechini synthesis of aluminoborate phosphors

Jérémy Cathalan<sup>1,2</sup>, Mathieu Salaün<sup>1,\*</sup>, Audrey Potdevin<sup>2</sup>, François Réveret<sup>2</sup>, Geneviève Chadeyron<sup>2</sup>, Isabelle Gautier-Luneau<sup>1,\*</sup>

<sup>1</sup> Univ. Grenoble Alpes, CNRS, Grenoble INP, Institut Néel, 38000 Grenoble, France

<sup>2</sup> Université Clermont Auvergne, Clermont Auvergne INP, CNRS, Institut de Chimie de Clermont-Ferrand, F-63000 Clermont-Ferrand, France

\*Mathieu Salaün ; e-mail : [mathieu.salaun@neel.cnrs.fr](mailto:mathieu.salaun@neel.cnrs.fr)

\*Isabelle Gautier-Luneau ; e-mail : [Isabelle.Gautier-Luneau@neel.cnrs.fr](mailto:Isabelle.Gautier-Luneau@neel.cnrs.fr)

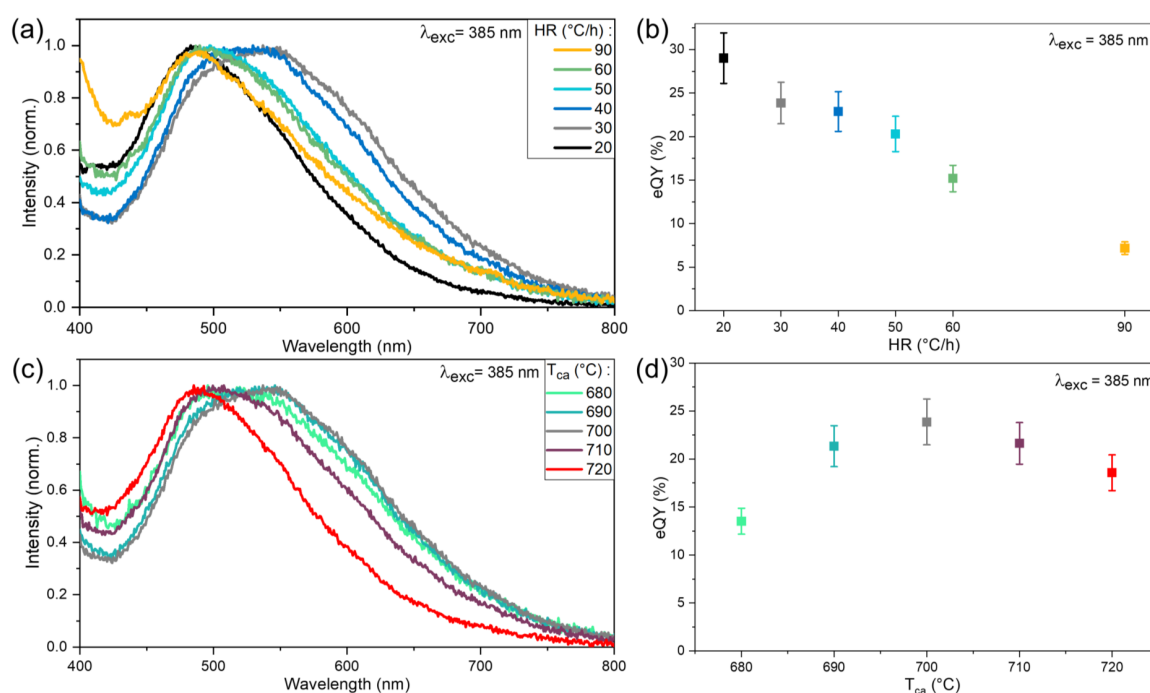

Figure S1. (a) Normalized emission spectra under 385 nm obtained for different heating rates during the calcination until 700°C of the pyrolyzed AB powder following the MW synthesis (b) associated external quantum yields. (c) Normalized emission spectra under 385 nm excitation obtained for different calcination temperatures during calcination treatment led at the optimized heating rate HR = 30°C/h (d) associated external quantum yields

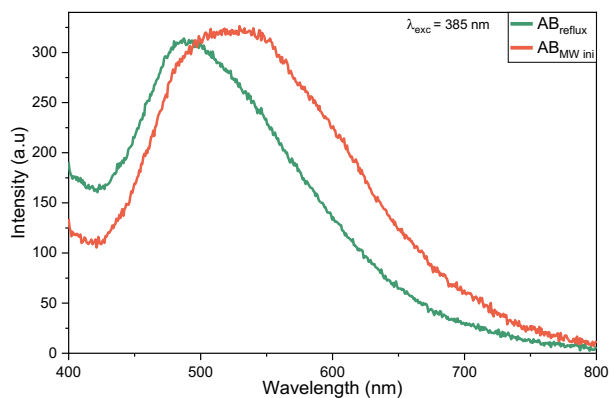

Figure S2. Emission spectra of the optimized reflux-heated powder and MW powder obtained with the same synthesis parameters under 385 nm excitation

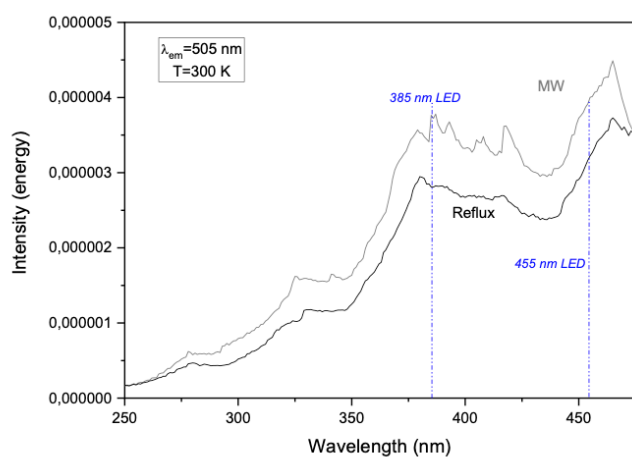

Figure S3. Excitation spectra of powders obtained by conventional reflux heating ( $AB_{reflux}$ ) and microwave heating ( $AB_{MW}$ ). Both powders can be excited over a wide wavelength range, including the emission wavelengths of conventional commercial LEDs emitting in the near-UV (385 nm) or blue (455 nm) wavelengths.

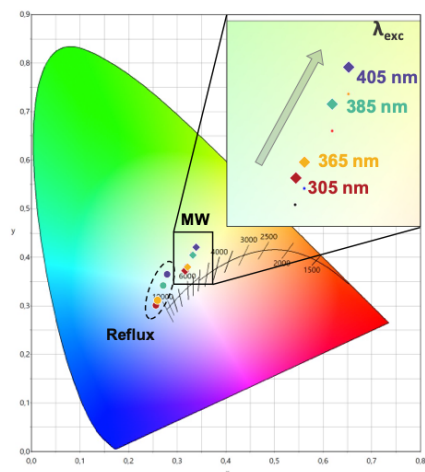

Figure S4. Trichromatic coordinates on the CIE diagram of heating  $AB_{reflux}$  powder surrounded by dotted line and  $AB_{MW}$  powder surrounded by solid lines (and in inset) recorded at  $\lambda_{exc} = 305; 365; 385$  and  $405$  nm.

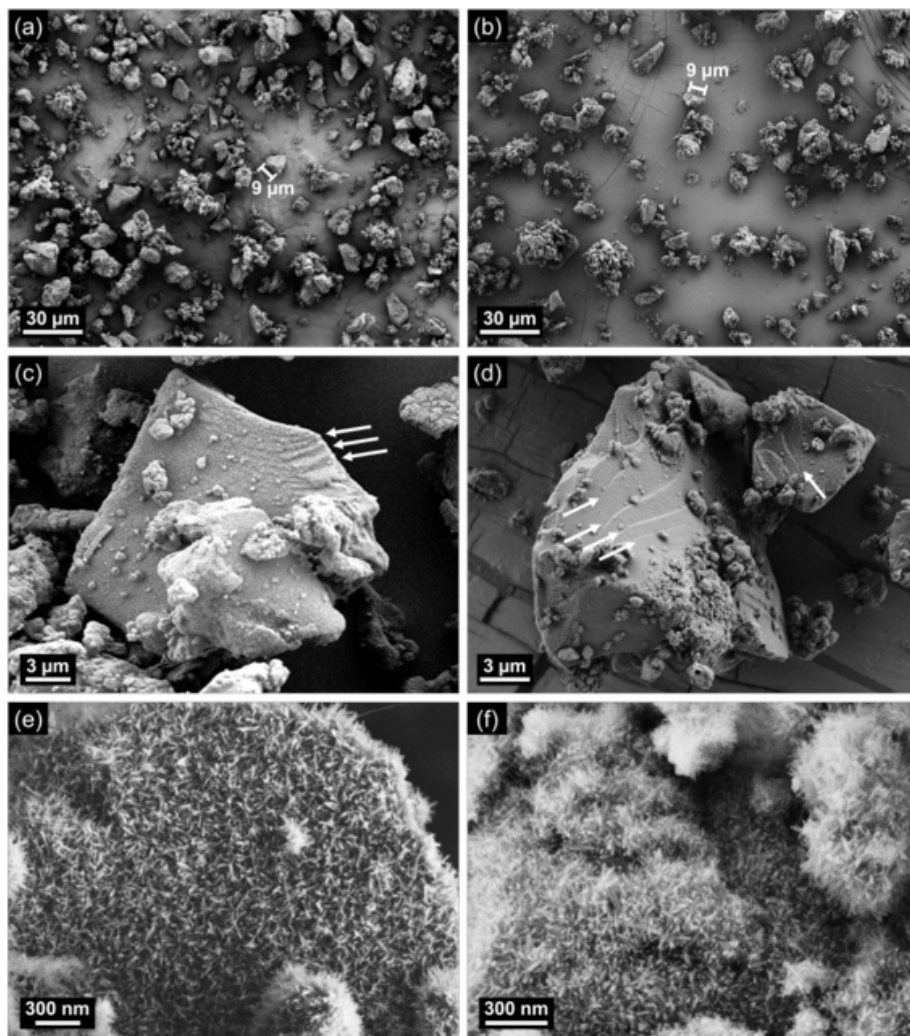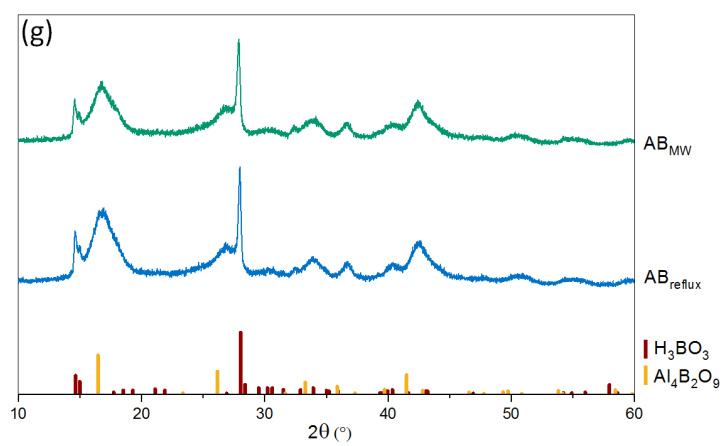

Figure S5. SEM images of (a)(c)(e) AB<sub>reflux</sub> and (b)(d)(f) AB<sub>MW</sub> calcined powders and (g) corresponding powder-XRD patterns

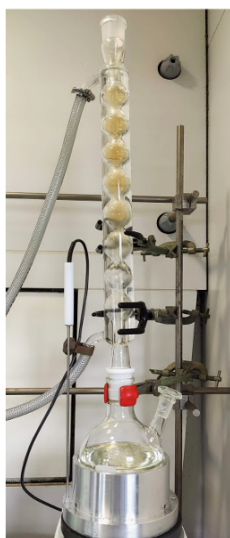

Figure S6. Photograph of the brownish fumes, corresponding to the  $\text{NO}_x$  gases released during the reflux heating

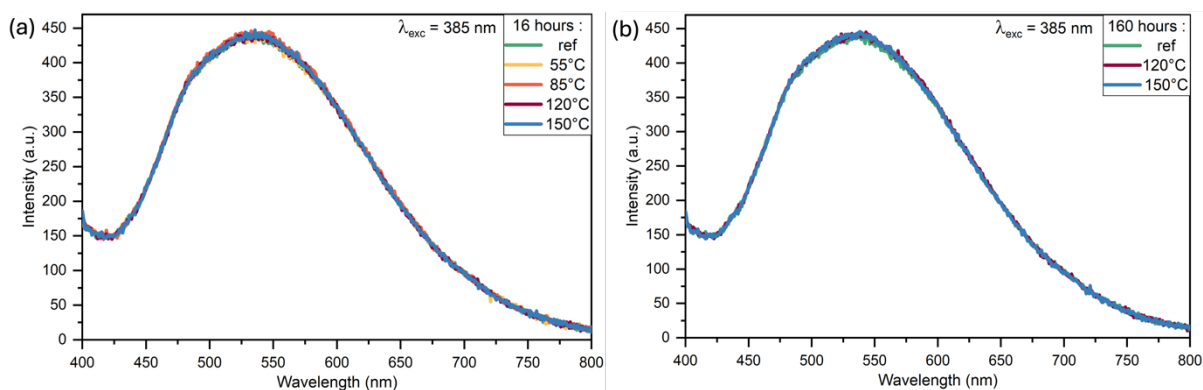

Figure S7. Emission spectra of  $\text{AB}_{\text{MW}}$  powder (a) after 16 hours in the oven at different temperatures and (b) after 160 hours ( $\lambda_{\text{exc}} = 385 \text{ nm}$ ) compared to the referent powder (ref) before aging. the emission spectra are all identical regardless of the heat treatment carried out (temperature and duration). The powder synthesized using MW-assisted autoclave heating is thermally stable.

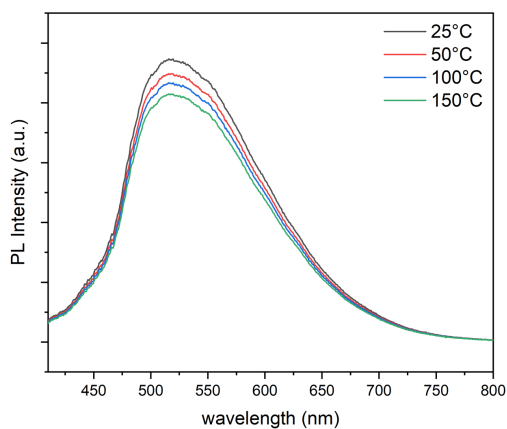

Figure S8. Temperature-dependent emission spectra of  $\text{AB}_{\text{MW}}$  powder ( $\lambda_{\text{exc}} = 375 \text{ nm}$ ) recorded between  $25^\circ\text{C}$  and  $150^\circ\text{C}$ .

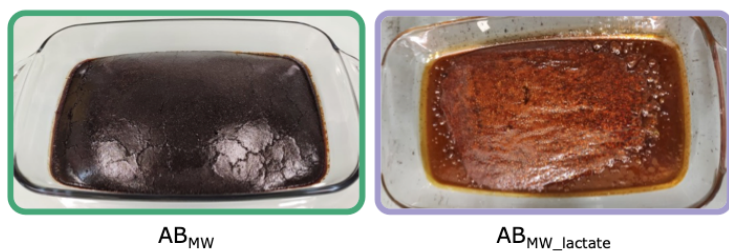

Figure S9. Photographs of the brown solids evidencing the expansion differences with (left, well-expanded) or without (right, non-expanded) the use of nitrate in the precursors.

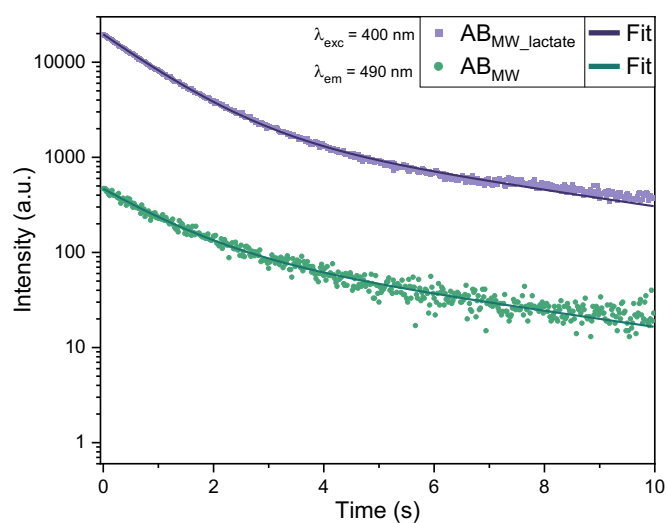

Figure S10. Room temperature decay curves recorded on  $AB_{MW}$  and  $AB_{MW\_Lact}$  powders monitoring the blue emission at  $\lambda_{em}=490$  nm (phosphorescent signal) under 400 nm excitation

Table S1: Fit parameters obtained from the fluorescence decays of  $AB_{MW}$  and  $AB_{MW\_Lact}$  powders under 400 nm excitation for 490 nm emission

| Sample          | $\lambda_{em}$ (nm) | $\tau_1$ (s)  | $\tau_2$ (s)  | $A_1$ (%) | $A_2$ (%) | $R^2$  |
|-----------------|---------------------|---------------|---------------|-----------|-----------|--------|
| $AB_{MW\_lact}$ | 490                 | $1,0 \pm 0,1$ | $5,1 \pm 0,1$ | 89        | 11        | 0,9996 |
| $AB_{MW}$       | 490                 | $1,1 \pm 0,1$ | $5,2 \pm 0,1$ | 76        | 24        | 0,9901 |

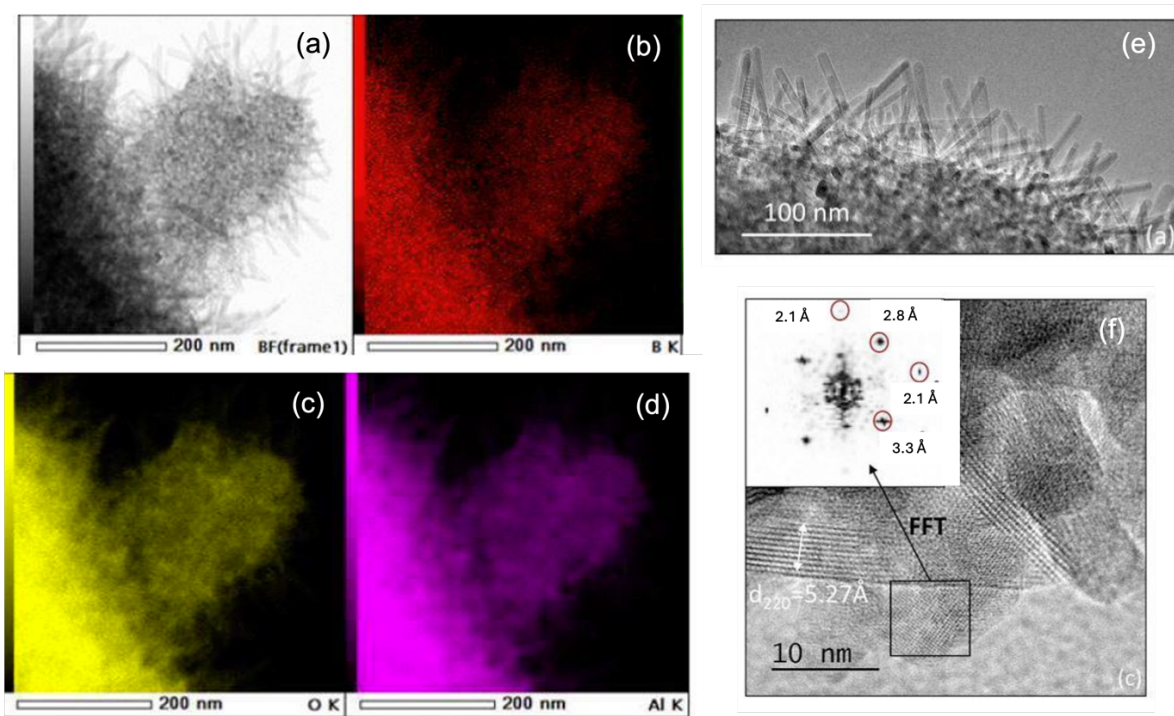

Figure S11. Image (a) and EDS maps obtained by STEM (acceleration voltage of 200 kV) of an  $AB_{MW}$  particle ( $T_{ca} = 700\text{ }^{\circ}\text{C}$ ) showing that the distribution of the B (b), Al (c), and O (d) elements is homogeneous. TEM image of the surface of  $AB_{MW}$  particle ( $T_{ca} = 700\text{ }^{\circ}\text{C}$ ) (e) and High-resolution image of surface nanowires (f) with FFT treatment shown in insert. The indexing unambiguously shows the  $Al_4B_2O_9$  phase, in good agreement with the XRD pattern (PDF card 04-012-8918).

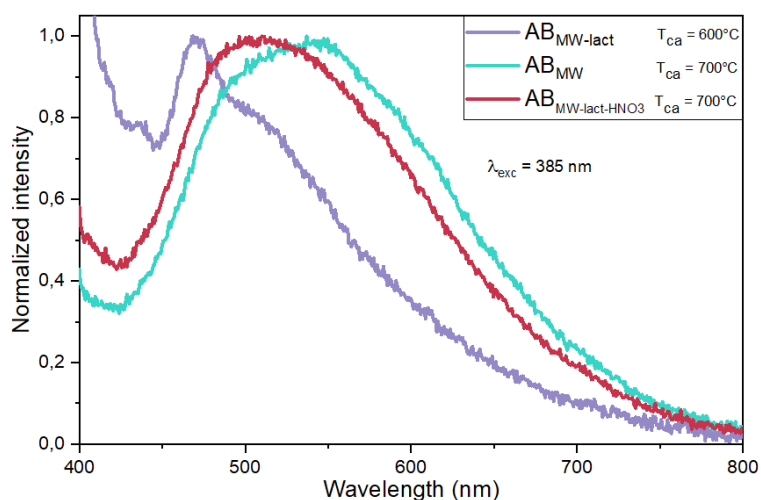

Figure S12: Normalized room-temperature emission spectra of  $AB_{MW}$  powders synthesised using different conditions (with or without nitrates and calcined at  $600^{\circ}\text{C}$  or  $700^{\circ}\text{C}$ ) recorded under 385 nm excitation

Table S2:  $AB_{MW}$  and  $AB_{MW\_lact+HNO_3}$  precursors ratios.

| Sample                   | $\text{NO}_3/\text{Al}$ | $\text{Al}(\text{NO}_3)_3 \cdot 9\text{H}_2\text{O}$ | $\text{Al}(\text{C}_3\text{H}_5\text{O}_3)_3$ | $\text{HNO}_3$ | $\text{H}_3\text{BO}_3$ | Cit    | Sorb   |
|--------------------------|-------------------------|------------------------------------------------------|-----------------------------------------------|----------------|-------------------------|--------|--------|
| $AB_{MW}$                | 3                       | 1                                                    | : 0                                           | : 0            | : 2                     | : 9,75 | : 9,75 |
| $AB_{MW\_lactate+HNO_3}$ | 3                       | 0                                                    | : 1                                           | : 3            | : 2                     | : 9,75 | : 9,75 |
